# Supplementary material
Source: ML conference proceedings conference paper supplement (https://aclanthology.org/P16-1045)
Supplement: Datasets [file TableIndex.xlsx]

## Sheet: Sheet1
Regents Table ID	Topic	# Rows		Monarch Table ID	Topic	# Rows		Auto Table ID	Mode of Collection	# Rows
regents-01	Orbital Event Daylight Hours	4		monarch-44	Organ Function	32		auto-18	Wordnet Definitions	2467
regents-02	Orbital Event Timing	8		monarch-45	Matter Phase Features	7		auto-fb1	Barrons' SVO Extraction	605
regents-03	Country Hemispheres	267		monarch-46	Organ/Plant Structure Input/Output	23		auto-fb2	Barrons' Targetted Extraction	564
regents-04	Country Subdivisions	214		monarch-47	Hemisphere/Season Relationship	13		auto-fn1	WebSentences SVO Extraction	395
regents-05&09	Earth Sciences Terms Examples	98		monarch-48	Renewable and Nonrenewable Resources	27		auto-fn2	WebSentences Targetted Extraction	387
regents-06	Phase Transitions	6		monarch-49	Effects of Forces	9
regents-07	Device Energy Conversion	65		monarch-50	Formation of Geological Features	19
regents-08	Material Conductance	32		monarch-51	Functions of Simple Machines	7
regents-10	Characteristic Inheritance	25		monarch-52	Lab Equipment Uses	16
regents-11&12	Adaptation to Environment	76		monarch-53	Magnetism	50
regents-13	Biology Part and Function	106		monarch-54	Chemical/Physical Changes	24
regents-14	Senses	5		monarch-55	Organ System Parts	12
regents-15	Measuring Tools Units	23		monarch-56	Materials Found in Everyday Objects	50
regents-16	Health Habits	316		monarch-57	Agents of Erosion	10
regents-17	Organism Activity Abstract Concrete	23		monarch-58	Types of Data Displays	7
regents-19	Device Function Example	11		monarch-59	Roles in Food Chains	9
regents-20	Energy Abstract Concrete	29		monarch-60	Types of Pollution	27
regents-21	Human-Environment Effects	131		monarch-61	Weather Conditions For Activities	89
regents-22	Orbital Time Periods	4		monarch-62	Evolution	5
regents-23	Orbital Time Lengths on Earth	6		monarch-63	Codependence	7
regents-24	Weather Terms	43		monarch-64	Moon Phases	6
regents-25&26	Resource Type Organism	9		monarch-65	Average Weights of Animals	1225
regents-27	Rate of State Change	3		monarch-66	Average Lifespan of Animals	118
regents-28	Plant Part and Use	5		monarch-67	Herbivores/Carnivores/Omnivores	487
regents-29	Camouflage	8
regents-30	Organism Life Cycle Stages	2
regents-31	Signal Transmission Medium	4
regents-32	Challenge Response	4
regents-33	Properties for Purpose	4
regents-34	State of Materials	4
regents-35	Experiment Design	4
regents-36	Magnetic Attractiveness of Materials	4
regents-37	Abstract Concrete	4
regents-38	Phase Transition of Liquids	6
regents-39	Human Resources Natural vs. Man Made	4
regents-40	Experimental Science	4
regents-41	Property Transformation by Action	4
regents-42	Living and Nonliving	4
regents-43	Energy for Processes	3
